# Supplementary material
Source: PubMed Central journal article supplement (PMC7018616)
Supplement: NIHMS1546517-supplement-3.pdf [file NIHMS1546517-supplement-3.pdf]

Graph 1. (Online only) Stemmer's Sign agreement with LVC $\geq$ 10%

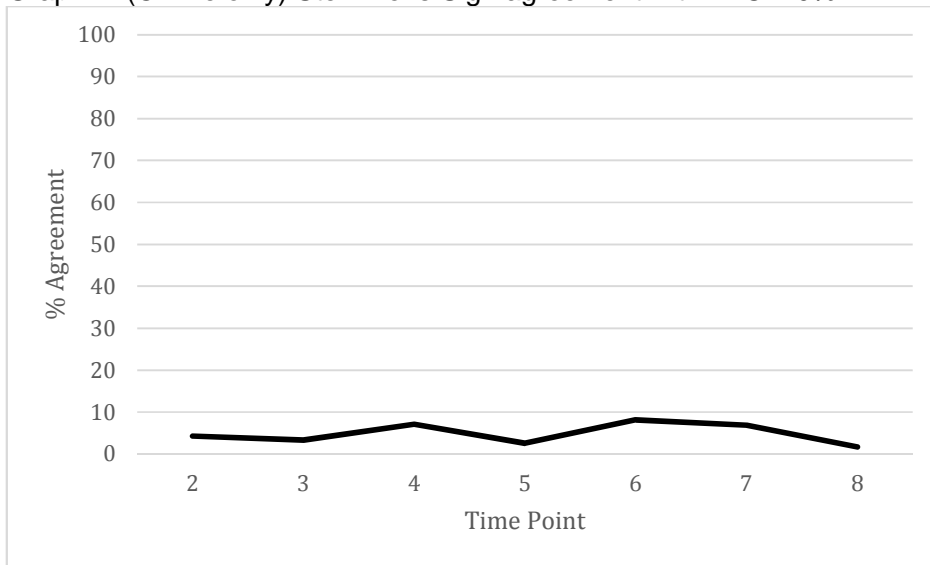

The Stemmer's Sign was used as a secondary measure of lymphedema but had no correlation with an increase in LVC (95% CI, 0.9618- 1.9772).
